# Supplementary material
Source: PubMed Central journal article supplement (PMC5604334)
Supplement: NIHMS867092-supplement-supplement_1.pdf [file NIHMS867092-supplement-supplement_1.pdf]

**Online Table 1. Subject Characteristics for Fontan 3 Subjects with PedsQL**

| <b>Variable</b>              | <b>N</b> | <b>Value</b> |
|------------------------------|----------|--------------|
| Age at Fontan 1 (years)      | 364      | 11.8 ± 3.4   |
| Age at Fontan 3 (years)      | 364      | 21.1 ± 3.5   |
| Gender, male                 | 222      | 61%          |
| Ethnicity                    | 362      |              |
| White                        | 290      | 80%          |
| Black                        | 32       | 9%           |
| Other                        | 40       | 11%          |
| Ventricular dominance        | 359      |              |
| Left ventricle               | 185      | 52%          |
| Right ventricle              | 116      | 32%          |
| Mixed                        | 58       | 16%          |
| Age at Fontan surgery        | 364      | 3.3 ± 2.0    |
| Type of Fontan connection    | 355      |              |
| Atriopulmonary connection    | 47       | 13%          |
| Intracardiac lateral tunnel  | 203      | 56%          |
| Extracardiac conduit         | 102      | 28%          |
| Other                        | 12       | 3%           |
| <b>PedsQL summary scores</b> |          |              |
| Physical                     | 364      | 74± 19       |
| Psychosocial                 | 364      | 75± 17       |

---

Values are mean±SD or %. Peds QL= Pediatric Quality of Life Inventory

**Online Table 2: Descriptive statistics for variables relevant to health care access**

| <b>Variable</b>                                       | <b>Fontan 2<br/>(N=420)</b> | <b>Fontan 3<br/>(N=373)</b> |
|-------------------------------------------------------|-----------------------------|-----------------------------|
| Age in years (mean $\pm$ standard deviation)          | 18.4 $\pm$ 3.4              | 21.2 $\pm$ 3.5              |
| Health Insurance                                      |                             |                             |
| Yes                                                   | 406 (97)                    | 357(96)                     |
| No                                                    | 14 (3)                      | 15(4)                       |
| Insurance Type                                        |                             |                             |
| Private                                               | 214 (53)                    | 187(52)                     |
| Public                                                | 192 (47)                    | 167(47)                     |
| Other                                                 | 0 (0)                       | 3(1)                        |
| Visited a Cardiologist in the Past Two Years          |                             |                             |
| Yes                                                   | 404 (96)                    | 359(97)                     |
| No                                                    | 16 (4)                      | 13(3)                       |
| Frequency of Cardiologist Visits                      |                             |                             |
| Less than once a year                                 | 41 (10)                     | 18(5)                       |
| Once a year                                           | 238 (59)                    | 237(66)                     |
| Twice a year                                          | 85 (21)                     | 78(22)                      |
| More than twice a year                                | 40 (10)                     | 26(7)                       |
| Visited an Adult Cardiologist in the Past Two Years   |                             |                             |
|                                                       | 86 (30)                     | 124(35)                     |
| Type of Cardiologist(s) Visited in the Past Two Years |                             |                             |
| Pediatric congenital heart specialist                 | 347 (86)                    | 293(82)                     |
| Adult congenital heart specialist                     | 96 (24)                     | 118(33)                     |
| General adult cardiologist                            | 15 (4)                      | 37 (10)                     |
| Electrophysiologist                                   | 57 (14)                     | 50 (14)                     |
| Heart failure specialist                              | 15 (4)                      | 15 (4)                      |
| Pulmonary hypertension specialist                     | 12 (3)                      | 7 (2)                       |
| Medical Services Received in the Past Two Years       |                             |                             |
| Dental care                                           | 385 (92)                    | 320(86)                     |
| Ophthalmology                                         | 261 (62)                    | 219(59)                     |

|                                                   |          |         |
|---------------------------------------------------|----------|---------|
| Education support                                 | 150 (36) | 97(26)  |
| Obstetrician/Gynecologist (Asked of Females only) | 64 (32)  | 58(41)  |
| Mental health                                     | 80 (19)  | 87(23)  |
| Dermatology                                       | 64 (15)  | 66(18)  |
| Neurology                                         | 61 (15)  | 53(14)  |
| Orthopedic                                        | 59 (14)  | 53 (14) |
| Rehabilitation/Physical therapy                   | 56 (13)  | 53 (14) |
| Otolaryngology                                    | 43 (10)  | 36 (10) |
| Pulmonology                                       | 42 (10)  | 34 (9)  |
| Occupational therapy                              | 37 (9)   | 16 (4)  |
| Speech therapy                                    | 37 (9)   | 21 (6)  |
| Endocrine                                         | 27 (6)   | 25 (7)  |
| Nutrition                                         | 27 (6)   | 28(8)   |
| Allergy services                                  | 26 (6)   | 14(4)   |
| Renal                                             | 18 (4)   | 20(5)   |
| Any other                                         | 70 (17)  | 36(10)  |

---

Data shown are n (%)
